# Supplementary material for: The Syk Tyrosine Kinase Is Required for Skin Inflammation in an In Vivo Mouse Model of Epidermolysis Bullosa Acquisita
Source: PubMed Central journal article supplement — J Invest Dermatol. 2017 Oct;137(10):2131–9. doi: 10.1016/j.jid.2017.05.017 (PMC5624865; doi:10.1016/j.jid.2017.05.017), 2017-10
Supplement: mmc1.pdf [file mmc1.pdf]

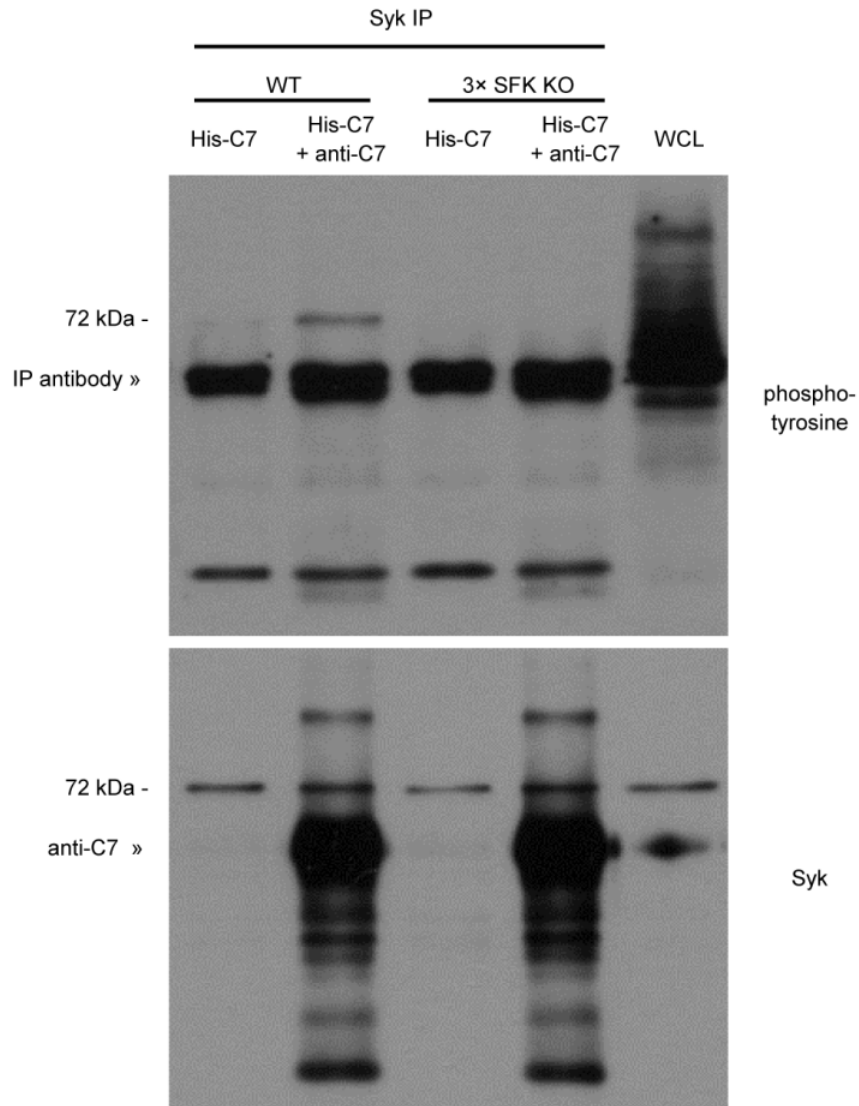

### Supplementary Figure S1

#### *Western blot images with more details*

Western blot images showing Syk phosphorylation and Syk expression in Syk-immunoprecipitated samples and whole cell lysates of neutrophils from Figure 1e. IP, immunoprecipitation; 3× SFK KO, *Hck<sup>-/-</sup>Fgr<sup>-/-</sup>Lyn<sup>-/-</sup>*; WCL, whole cell lysate; WT, wild type.
